# Supplementary material
Source: PubMed Central journal article supplement (PMC166270)

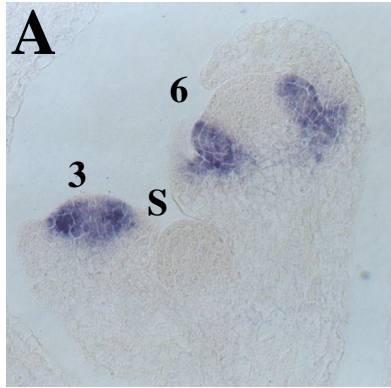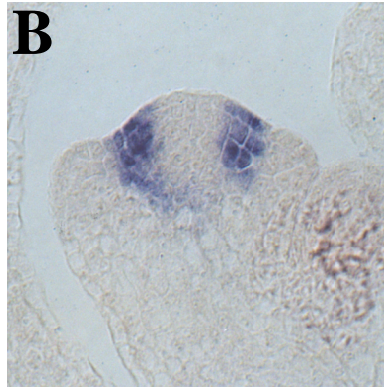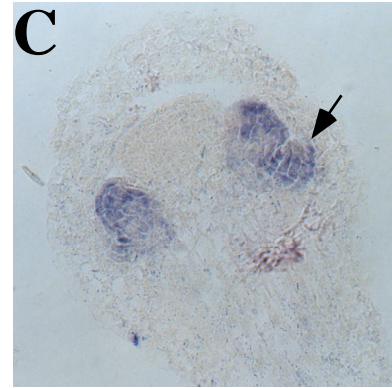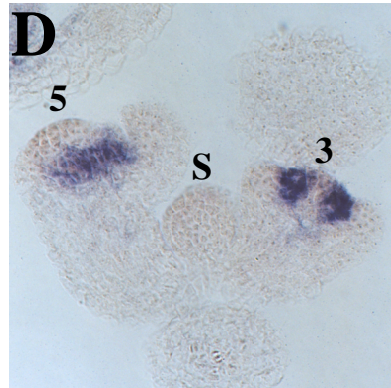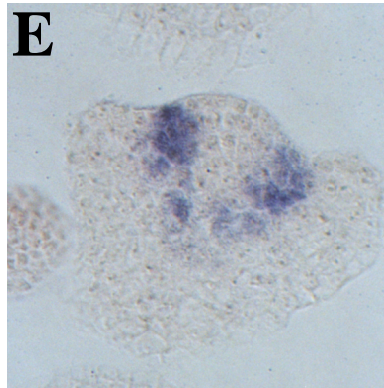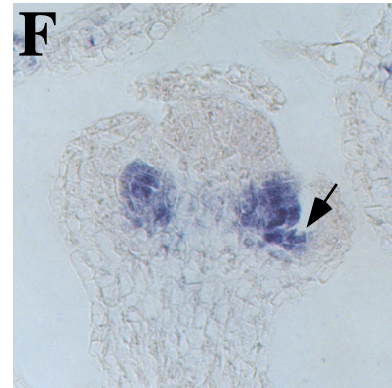

Supplement: pnas_100_14_8571__4.pdf [file pnas_100_14_8571__4.pdf]
